# Supplementary material for: Rationalizing the diversity of amide–amide H-bonding in peptides using the natural bond orbital method
Source: Royal Society of Chemistry journal article supplement (doi:10.1039/c9cp03825f), 2019-01-01
Supplement: c9cp03825f1.pdf [file c9cp03825f1.pdf]

# Rationalizing the diversity of amide-amide H-bonding in peptides using the Natural Bond Orbital method

Valérie Brenner, Eric Gloaguen and Michel Mons

CEA, CNRS, Université Paris-Saclay, LIDYL, bât 522, CEA Paris – Saclay, 91191 Gif-sur-Yvette, France

## Supplementary Information

### *Content*

**Fig. S1** : Geometrical parameters describing the *trans*-methylacetamide dimer geometry

**Fig. S2** : Comparison of the Ala and Phe inverse  $\gamma$ -turns

**Table S1** : NBO analysis of C7- and C5-stabilized model molecules

**Table S2** : Geometric parameters of *trans*-methylacetamide dimers

**Table S3** : NBO geometric parameters of the C-side dimer

**Table S4** : NBO geometric parameters of the N'-side dimer

**Table S5** : List of molecular conformations analyzed

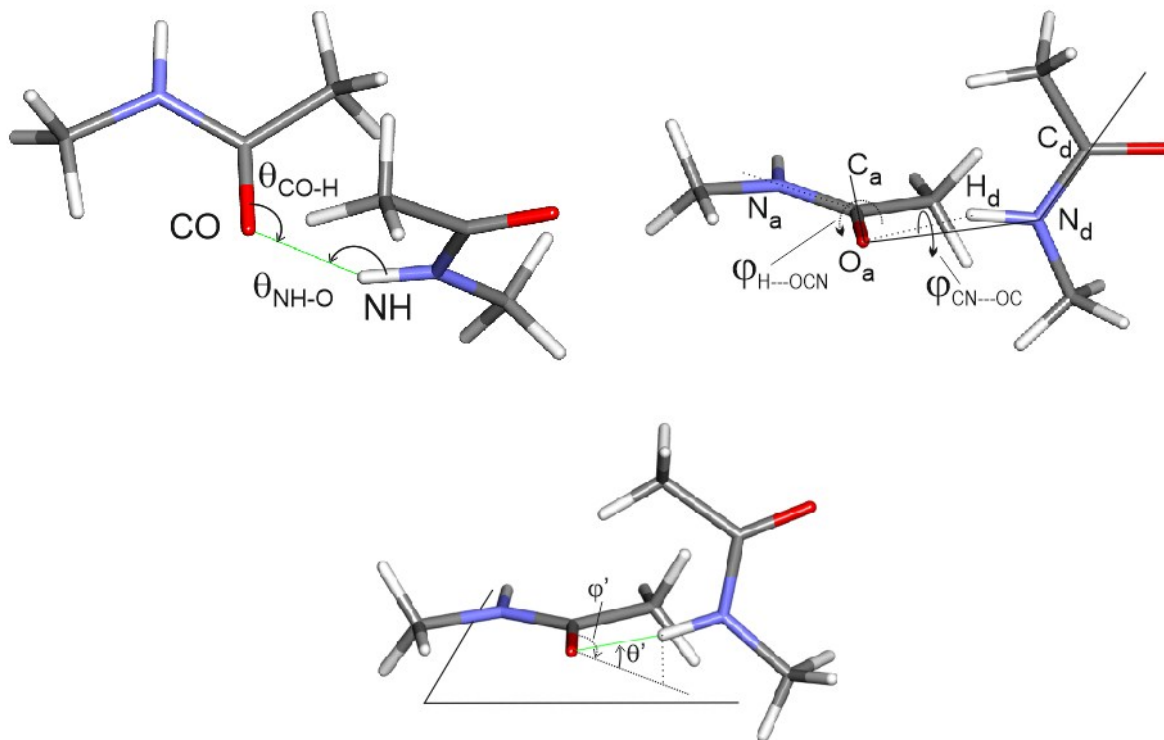

Figure S1 : Description of the geometrical parameters used for the description of H-bonded *trans*-methylacetamide dimers.

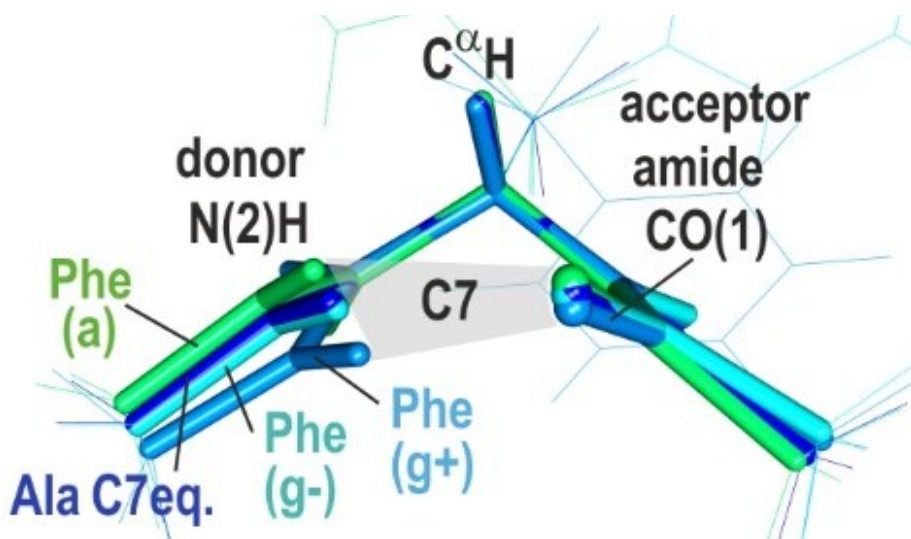

Fig. S2 : Comparison of the C7eq inverse  $\gamma$ -turn of Ala (dark blue) with those of Phe for the three rotamers of the Phe side chain (*gauche +*, in blue; *gauche -* in turquoise and *anti* in green), obtained by overlapping the N(1), C $^{\alpha}$  and C(2) atoms. For the sake of clarity, the side chains are displayed as simple lines. The picture illustrates the slight changes in  $\psi$  dihedral and in the HB approach induced by the backbone-side chain interactions.

**Table S1 : NBO analysis of the relevant conformations (C7eq, C7ax, C5) of the AcAlaNHMe, AcAibNHMe, AcGlyNHMe and N-isopropylacetamide molecules : Stabilisation energy E(2) (kcal/mol) of the relevant donor NBO → acceptor NBO interactions. For C7 structures, the second and third lines indicate the nature of the groups present in equatorial and axial position.**

| AcAlaNHMe C7eq                                                        |      | N-isopropyl acetamide                                                |     | AcAlaNHMe C7ax                                                        |       | AcAibNHMe C7                                                          |       | AcAlaNHMe C5                                                     |      | AcGlyNHMe C5                                           |      | AcAibNHMe C5                                                      |      |
|-----------------------------------------------------------------------|------|----------------------------------------------------------------------|-----|-----------------------------------------------------------------------|-------|-----------------------------------------------------------------------|-------|------------------------------------------------------------------|------|--------------------------------------------------------|------|-------------------------------------------------------------------|------|
| <b>HC0 set</b>                                                        |      |                                                                      |     |                                                                       |       |                                                                       |       |                                                                  |      |                                                        |      |                                                                   |      |
| nN(1) → σ* <sup>C<sup>α</sup></sup> C(2)                              | 10.1 | nN(1) → σ* <sup>C<sup>α</sup></sup> C(2)                             | 9.0 | nN(1) → σ* <sup>C<sup>α</sup></sup> C(2)                              | 9.6   | nN(1) → σ* <sup>C<sup>α</sup></sup> C(2)                              | 9.8   | nN(1) → σ* <sup>C<sup>α</sup></sup> C(2)                         | 1.1  |                                                        |      |                                                                   |      |
| nN(1) → σ* <sup>C<sup>α</sup></sup> H (ax)                            | 2.7  | nN(1) → σ* <sup>C<sup>α</sup></sup> H (ax)                           | 2.4 | nN(1) → σ* <sup>C<sup>α</sup></sup> H (eq)                            | < 0.5 | nN(1) → σ* <sup>C<sup>α</sup></sup> C <sup>β</sup> (eq)               | < 0.5 | nN(1) → σ* <sup>C<sup>α</sup></sup> H                            | 5.3  | nN(1) → σ* <sup>C<sup>α</sup></sup> H                  | 9.1  | nN(1) → σ* <sup>C<sup>α</sup></sup> C <sup>β</sup>                | 7.6  |
| nN(1) → σ* <sup>C<sup>α</sup></sup> C <sup>β</sup> (eq)               | 1.6  | nN(1) → σ* <sup>C<sup>α</sup></sup> C <sup>β</sup> (eq)              | 2.2 | nN(1) → σ* <sup>C<sup>α</sup></sup> C <sup>β</sup> (ax)               | 5.8   | nN(1) → σ* <sup>C<sup>α</sup></sup> C <sup>β</sup> (ax)               | 5.2   | nN(1) → σ* <sup>C<sup>α</sup></sup> C <sup>β</sup>               | 9.2  | nN(1) → σ* <sup>C<sup>α</sup></sup> H                  | 9.0  | nN(1) → σ* <sup>C<sup>α</sup></sup> C <sup>β</sup>                | 7.8  |
| <b>HC1 set</b>                                                        |      |                                                                      |     |                                                                       |       |                                                                       |       |                                                                  |      |                                                        |      |                                                                   |      |
| σ <sup>C<sup>α</sup></sup> H (ax) → σ* <sup>N(1)</sup> H              | 3.5  | σ <sup>C<sup>α</sup></sup> H (ax) → σ* <sup>N(1)</sup> H             | 4.4 | σ <sup>C<sup>α</sup></sup> C <sup>β</sup> (ax) → σ* <sup>N(1)</sup> H | 1.2   | σ <sup>C<sup>α</sup></sup> C <sup>β</sup> (ax) → σ* <sup>N(1)</sup> H | 1.7   | σ <sup>C<sup>α</sup></sup> H → σ* <sup>N(1)</sup> H              | 2.6  | σ <sup>C<sup>α</sup></sup> H → σ* <sup>N(1)</sup> H    | 1.5  | σ* <sup>C<sup>α</sup></sup> C <sup>β</sup> → σ* <sup>N(1)</sup> H | 1.2  |
|                                                                       |      |                                                                      |     |                                                                       |       |                                                                       |       | σ <sup>C<sup>α</sup></sup> C <sup>β</sup> → σ* <sup>N(1)</sup> H | 0.6  | σ <sup>C<sup>α</sup></sup> H' → σ* <sup>N(1)</sup> H   | 1.5  | σ* <sup>C<sup>α</sup></sup> C <sup>β</sup> → σ* <sup>N(1)</sup> H | 1.2  |
|                                                                       |      |                                                                      |     |                                                                       |       |                                                                       |       |                                                                  |      | σ <sup>C<sup>α</sup></sup> C(2) → σ* <sup>N(1)</sup> H | 0.6  | σ* <sup>C<sup>α</sup></sup> C(2) → σ* <sup>N(1)</sup> H           | 0.7  |
| σCO(1) → σ* <sup>N(1)</sup> H                                         | 1.7  | σCO(1) → σ* <sup>N(1)</sup> H                                        | 1.8 | σCO(1) → σ* <sup>N(1)</sup> H                                         | 1.6   | σCO(1) → σ* <sup>N(1)</sup> H                                         | 1.7   | σCO(1) → σ* <sup>N(1)</sup> H                                    | 1.9  | σCO(1) → σ* <sup>N(1)</sup> H                          | 1.9  | σCO(1) → σ* <sup>N(1)</sup> H                                     | 1.9  |
| <b>HC2 set</b>                                                        |      |                                                                      |     |                                                                       |       |                                                                       |       |                                                                  |      |                                                        |      |                                                                   |      |
| σ <sup>C<sup>α</sup></sup> C <sup>β</sup> (eq) → σ* <sup>CN(1)</sup>  | 3.4  | σ <sup>C<sup>α</sup></sup> C <sup>β</sup> (eq) → σ* <sup>CN(1)</sup> | 3.2 | σ <sup>C<sup>α</sup></sup> H (eq) → σ* <sup>CN(1)</sup>               | 6.0   | σ <sup>C<sup>α</sup></sup> C <sup>β</sup> (eq) → σ* <sup>CN(1)</sup>  | 4.7   |                                                                  |      |                                                        |      |                                                                   |      |
| σ <sup>C<sup>α</sup></sup> C <sup>β</sup> (eq) → σ* <sup>CN(2)</sup>  | 2.6  |                                                                      |     | σ <sup>C<sup>α</sup></sup> H (eq) → σ* <sup>CN(2)</sup>               | 4.7   | σ <sup>C<sup>α</sup></sup> C <sup>β</sup> (eq) → σ* <sup>CN(2)</sup>  | 3.0   |                                                                  |      |                                                        |      |                                                                   |      |
| σ <sup>C<sup>α</sup></sup> C <sup>β</sup> (eq) → σ* <sup>N(1)</sup> H |      |                                                                      |     | σ <sup>C<sup>α</sup></sup> H (eq) → σ* <sup>N(1)</sup> H              | 0.8   | σ <sup>C<sup>α</sup></sup> C <sup>β</sup> (eq) → σ* <sup>N(1)</sup> H | 0.8   |                                                                  |      |                                                        |      |                                                                   |      |
| <b>H-bonding</b>                                                      |      |                                                                      |     |                                                                       |       |                                                                       |       | <b>H-bonding</b>                                                 |      |                                                        |      |                                                                   |      |
| nO(1) → σ* <sup>N(2)</sup> H                                          | 2.49 |                                                                      |     |                                                                       | 5.50  |                                                                       | 9.75  | nO(2) → σ* <sup>N(1)</sup> H                                     | 0.15 |                                                        | 0.21 |                                                                   | 0.69 |
| n'O(1) → σ* <sup>N(2)</sup> H                                         | 1.27 |                                                                      |     |                                                                       | 3.11  |                                                                       | 3.58  | n'O(2) → σ* <sup>N(1)</sup> H                                    | 0.94 |                                                        | 1.16 |                                                                   | 2.80 |
| πCO(1) → σ* <sup>N(2)</sup> H                                         | 1.01 |                                                                      |     |                                                                       | 1.90  |                                                                       | 2.17  |                                                                  |      |                                                        |      |                                                                   |      |
| Sum of H-bond contributions                                           | 4.8  |                                                                      |     |                                                                       | 10.5  |                                                                       | 12.0  |                                                                  | 1.1  |                                                        | 1.4  |                                                                   | 3.5  |

**Table S2 : Energetic, structural and NBO parameters of the three H-bonded minima of the trans-methylacetamide dimer**

|                                                                                           | C-side  |           | N-side  |           | N'-side   |
|-------------------------------------------------------------------------------------------|---------|-----------|---------|-----------|-----------|
|                                                                                           | Ref. 37 | this work | Ref. 37 | this work | this work |
| $\Delta E$ kcal/mol                                                                       | 0       |           | 0.03    |           |           |
|                                                                                           |         | 0         |         | 0.16      | 0.02      |
| R(H $\cdots$ O) pm                                                                        | 197.1   | 195.3     | 197.7   | 196.6     | 197.6     |
| $\theta$ (NH $\cdots$ O) deg                                                              | 171     | 169       | 175     | 173       | 169       |
| $\theta$ (CO $\cdots$ H) deg                                                              | 120     | 118       | 142     | 138       | 126       |
| $\varphi$ (H $\cdots$ OCN) deg                                                            | -171    | -178      | -6      | -11       | +44       |
| $\varphi$ (CN $\cdots$ OC) deg                                                            | -76     | -75       | -77     | -71       | -40       |
| E(2) $n_O \rightarrow \sigma_{NH}^* + E(2) n'_{O'} \rightarrow \sigma_{NH}^*$<br>kcal/mol | 13.82   |           | 12.56   |           |           |
| $\Sigma E_{HB}$ kcal/mol                                                                  |         | 9.90      |         | 8.37      | 7.39      |
| Harmonic NH stretch (cm $^{-1}$ ) donor                                                   |         | 3406      |         | 3442      | 3437      |

**Table S3 : NBO analysis of the C-side dimer as a function of the HB distance : sum of the stabilization energies related to the HB ( $\Sigma E_{HB}$ ), population of the  $\sigma_{NH}^*$  NBOs in the dimer relative to the reference (taken as the separated molecules), and sum of the natural population analysis (NPA) charges of each molecule in the dimer relative to the sum of NPA charges of the isolated monomer. Energies are given in kcal/mol, populations and charges in milli-e.**

| Distances<br>pm                    | $\Sigma E_{HB}$<br>kcal/mol | Pop. $\sigma_{NH}^*$ /<br>reference <sup>a</sup><br>me | $\Sigma q_{NPA}$ me          |
|------------------------------------|-----------------------------|--------------------------------------------------------|------------------------------|
| 177.3                              | 20.09 <sup>b</sup>          | 30.2                                                   | $\pm 37.3$                   |
| 182.1                              | 16.49                       | 26.1                                                   | $\pm 32.8$                   |
| 186.4                              | 13.80                       | 22.8                                                   | $\pm 29.2$                   |
| <b>195.3</b><br><b>equilibrium</b> | <b>9.90<sup>b</sup></b>     | <b>17.2</b>                                            | <b><math>\pm 22.8</math></b> |
| 204.3                              | 6.67                        | 12.6                                                   | $\pm 17.5$                   |
| 210.3                              | 5.23                        | 10.2                                                   | $\pm 14.8$                   |
| 216.9                              | 3.93 <sup>b</sup>           | 7.9                                                    | $\pm 11.7$                   |

a) The reference is the population of the  $\sigma_{NH}^*$  of the HB acceptor fragment at the equilibrium geometry of the dimer, 31.3 me.

b) individual E(2) contributions (kcal/mol)

|                                           |       |      |       |
|-------------------------------------------|-------|------|-------|
| distance (pm)                             | 177.3 | min  | 216.9 |
| $n_{O(1)} \rightarrow \sigma_{N(2)H}^*$   | 6.58  | 3.33 | 1.12  |
| $n'_{O'(1)} \rightarrow \sigma_{N(2)H}^*$ | 13.15 | 6.58 | 2.72  |

**Table S4 : NBO analysis of the N'-side dimer as a function of the HB distance : sum of the stabilization energies related to the HB ( $\Sigma E_{\text{HB}}$ ), population of the  $\sigma^*_{\text{NH}}$  NBOs in the dimer relative to the reference (taken as the separated molecules), and sum of the NPA charges of each molecule in the dimer relative to the sum of NPA charges of the isolated monomer. Energies are given in kcal/mol, populations and charges in milli-e.**

| Distances<br>pm                    | $\Sigma E_{\text{HB}}$<br>kcal/mol | Pop.<br>$\sigma^*_{\text{NH}}/\text{ref}^a$<br>me | $\Sigma q_{\text{NPA}}$ me   |
|------------------------------------|------------------------------------|---------------------------------------------------|------------------------------|
| 178.8                              | 16.45                              | 26.1                                              | $\pm 32.1$                   |
| 187.3                              | 11.91                              | 18.9                                              | $\pm 25.4$                   |
| <b>197.6</b><br><b>equilibrium</b> | <b>7.39</b>                        | <b>13.3</b>                                       | <b><math>\pm 18.9</math></b> |
| 207.9                              | 4.83                               | 9.0                                               | $\pm 14.18$                  |

a)  
The reference is the population of the  $\sigma^*_{\text{NH}}$  of the HB acceptor fragment at the equilibrium geometry of the dimer, 31.8 me.

b) individual E(2) contributions (kcal/mol)

| distance (pm)                                                 | 178.8 | 187.3 | <b>197.6</b><br><b>equilibrium</b> | 207.9 |
|---------------------------------------------------------------|-------|-------|------------------------------------|-------|
| $n_{\text{O}(1)} \rightarrow \sigma^*_{\text{N}(2)\text{H}}$  | 8.04  | 5.75  | 3.58                               | 2.13  |
| $n'_{\text{O}(1)} \rightarrow \sigma^*_{\text{N}(2)\text{H}}$ | 5.62  | 4.10  | 2.73                               | 1.81  |
| $\pi_{\text{CO}} \rightarrow \sigma^*_{\text{N}(2)\text{H}}$  | 2.18  | 1.68  | 1.08                               | 0.76  |

**Table S5 : H-bonds analyzed using the NBO methodology, sorted according to the sequence, the molecular conformation and the caps, with short notation, HB distance, NBO stabilization energies  $\Sigma E_{\text{HB}}$ , population of the  $\sigma^*_{\text{NH}}$  NBO and harmonic NH stretch frequency at the B97D3-BJ-abc/def2-**

| Residue/Sequence Conformation                    | N-terminal cap | C-terminal cap   | Abbreviation                  | NH - OC Distance (pm) | $\Sigma E_{\text{HB}}$ (kcal/mol) | Pop. (me) $\sigma^*_{\text{NH}}$ NBO | Harm. NH stretch freq. ( $\text{cm}^{-1}$ ) |
|--------------------------------------------------|----------------|------------------|-------------------------------|-----------------------|-----------------------------------|--------------------------------------|---------------------------------------------|
| <b>C-side t-MAA dimer</b>                        |                |                  | C-side                        | 195.3                 | 9.90                              | 48.51                                | 3406                                        |
| <b>N-side t-MAA dimer</b>                        |                |                  | N-side                        | 196.6                 | 8.37                              | 44.79                                | 3442                                        |
| <b>N'-side t-MAA dimer</b>                       |                |                  | N'-side                       | 197.6                 | 7.39                              | 45.10                                | 3437                                        |
|                                                  |                |                  |                               |                       |                                   |                                      |                                             |
| <b>Ala C7eq</b>                                  | Ac-            | -NHMe            | Ala 7eq                       | 206.3                 | 4.77                              | 42.60                                | 3442                                        |
| <b>Ala C7ax</b>                                  | Ac-            | -NHMe            | Ala 7ax                       | 189.3                 | 10.51                             | 51.85                                | 3385                                        |
| <b>Aib C7</b>                                    | Ac-            | -NHMe            | Aib C7                        | 185.8                 | 12.50                             | 55.60                                | 3359                                        |
| <b>Gly C7</b>                                    | Ac-            | -NHMe            | Gly C7                        | 203.7                 | 5.38                              | 36.95                                | 3529                                        |
| <b>Phe(g+) C7eq</b>                              | Ac-            | -NHMe            | Phe(g+) C7eq                  | 195.5                 | 7.98                              | 48.10                                | 3400                                        |
| <b>Phe(g-) C7eq</b>                              | Ac-            | -NHMe            | Phe(g-) C7eq                  | 201.2                 | 6.36                              | 45.51                                | 3415                                        |
| <b>Phe(a) C7eq</b>                               | Ac-            | -NHMe            | Phe(a) C7eq                   | 218.8                 | 2.52                              | 38.67                                | 3483                                        |
|                                                  |                |                  |                               |                       |                                   |                                      |                                             |
| <b>Ala C5</b>                                    | Ac-            | -NHMe            | Ala C5                        | 222.0                 | 1.09                              | 36.43                                | 3531                                        |
| <b>Aib C5</b>                                    | Ac-            | -NHMe            | Aib C5                        | 203.4                 | 3.49                              | 42.03                                | 3490                                        |
| <b>Gly C5</b>                                    | Ac-            | -NHMe            | Gly C5                        | 219.7                 | 1.37                              | 36.95                                | 3529                                        |
| <b>Phe(a) C5</b>                                 | Ac-            | -NHMe            | Phe C5                        | 222.8                 | 1.05                              | 36.85                                | 3531                                        |
|                                                  |                |                  |                               |                       |                                   |                                      |                                             |
| <b><math>\beta^3\text{hPhe C6}</math></b>        | Ac-            | -NHMe            | $\beta^3\text{hPhe C6}$       | 211.8                 | 3.34                              | 39.95                                | 3502                                        |
|                                                  |                |                  |                               |                       |                                   |                                      |                                             |
| <b>Gly-Phe <math>\beta</math>-turn typeI</b>     | Ac-            | -NH <sub>2</sub> | GF C10 I                      | 208.6                 | 4.18                              | 42.34                                | 3498                                        |
| <b>Gly-Phe <math>\beta</math>-turn typeII'</b>   | Ac-            | -NH <sub>2</sub> | GF C10 II'                    | 207.5                 | 4.14                              | 41.71                                | 3492                                        |
|                                                  |                |                  |                               |                       |                                   |                                      |                                             |
| <b>Ala-Ala-Ala <math>3_{10}</math> N-term HB</b> | Ac-            | -NHMe            | 310 AAA N-term                | 214.0                 | 3.46                              | 43.55                                | 3477                                        |
| <b>Ala-Ala-Ala <math>3_{10}</math> C-term HB</b> | Ac-            | -NHMe            | 310 AAA C-term                | 217.3                 | 2.55                              | 39.77                                | 3529                                        |
| <b>Aib-Aib-Aib <math>3_{10}</math> N-term HB</b> | Ac-            | -NHMe            | 310 (Aib) <sub>3</sub> N-term | 215.2                 | 3.42                              | 42.51                                | 3481                                        |
| <b>Aib-Aib-Aib <math>3_{10}</math> C-term HB</b> | Ac-            | -NHMe            | 310 (Aib) <sub>3</sub> C-term | 207.9                 | 3.49                              | 41.96                                | 3507                                        |
| <b>Ala-Phe-Ala <math>3_{10}</math> N-term HB</b> | Ac-            | -NHMe            | 310 AAA N-term                | 205.1                 | 5.25                              | 47.39                                | 3455                                        |
| <b>Ala-Phe-Ala <math>3_{10}</math> C-term HB</b> | Ac-            | -NHMe            | 310 AAA C-term                | 220.9                 | 2.27                              | 43.32                                | 3495                                        |
|                                                  |                |                  |                               |                       |                                   |                                      |                                             |
| <b>ACHC C9 Ref. 31</b>                           | Ac-            | -NHBn            | ACHC C9                       | 187.9                 | 13.05                             | 56.49                                | 3353                                        |
| <b>ACHC C9</b>                                   | Ac-            | -NHMe            | ACHC Me Me C9                 | 192.1                 | 9.49                              | 50.35                                | 3404                                        |
|                                                  |                |                  |                               |                       |                                   |                                      |                                             |
| <b>t-ACBC t-1 Ref. 30</b>                        | tBuO-CO-       | -NHBn            | tACBC C8                      | 195.8                 | 9.64                              | 50.87                                | 3390                                        |
| <b>t-ACBC t-1</b>                                | Ac-            | -NHMe            | tACBC Me Me C8                | 191.7                 | 11.09                             | 51.29                                | 3394                                        |
|                                                  |                |                  |                               |                       |                                   |                                      |                                             |
| <b>c-ACBC c-1 Ref. 30</b>                        | tBuO-CO-       | -NHBn            | cACBC C8                      | 225.5                 | 2.16                              | 37.73                                | 3497                                        |
|                                                  |                |                  |                               |                       |                                   |                                      |                                             |
| <b>Aza z-1 Ref. 30</b>                           | tBuO-CO-       | -NHBn            | Aza C8+C5                     | 208.4                 | 6.10                              | 46.77                                | 3416                                        |
|                                                  |                |                  |                               |                       |                                   |                                      |                                             |

TZVPPD level of theory.
